# Supplementary material for: Self-assembled magnetite peony structures with petal-like nanoslices: one-step synthesis, excellent magnetic and water treatment properties
Source: Royal Society of Chemistry journal article supplement (doi:10.1039/c2ra01229d), 2012-01-01
Supplement: c2ra01229d.pdf [file c2ra01229d.pdf]

# Supporting Information

## **Self-assembled magnetite peony structures with petal-like nanoslices: one-step synthesis, excellent magnetic and water treatment properties**

**Jingping Wang,<sup>a</sup> Tian Xia,<sup>\*b</sup> Chunli Wu,<sup>a</sup> Jing Feng,<sup>a</sup> Fuchang Meng,<sup>b</sup> Zhan Shi,<sup>b</sup> and Jian Meng<sup>c</sup>**

<sup>a</sup> *College of Materials Science and Chemical Engineering, Harbin Engineering University, Harbin 150001, P. R. China.*

*Fax: 86 451 8258 9428; Tel: 86 451 82589428; E-mail: [wangjingping@hrbeu.edu.cn](mailto:wangjingping@hrbeu.edu.cn)*

<sup>b</sup> *Key Laboratory of Functional Inorganic Materials Chemistry, Ministry of Education, School of chemistry, Chemical Engineering and Materials, Heilongjiang University, Harbin 150080, P. R. China. Fax: 86 451 8660 8426; Tel: 86 451*

*8660 8426; E-mail: [xiatian0621@yahoo.com.cn](mailto:xiatian0621@yahoo.com.cn)*

<sup>c</sup> *State Key Laboratory of Rare Earth Resource Utilization, Changchun Institute of Applied Chemistry, Changchun 130022, P. R. China.*

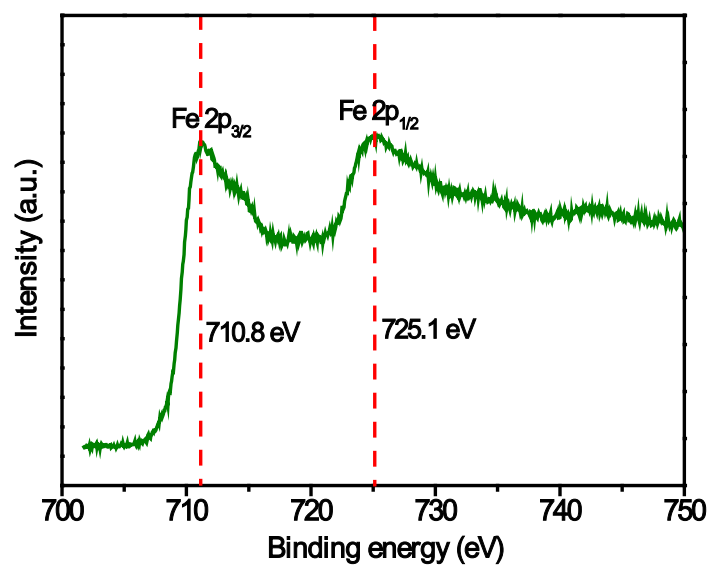

**Fig. S1** XPS spectrum of the Fe<sub>3</sub>O<sub>4</sub> peony structures.

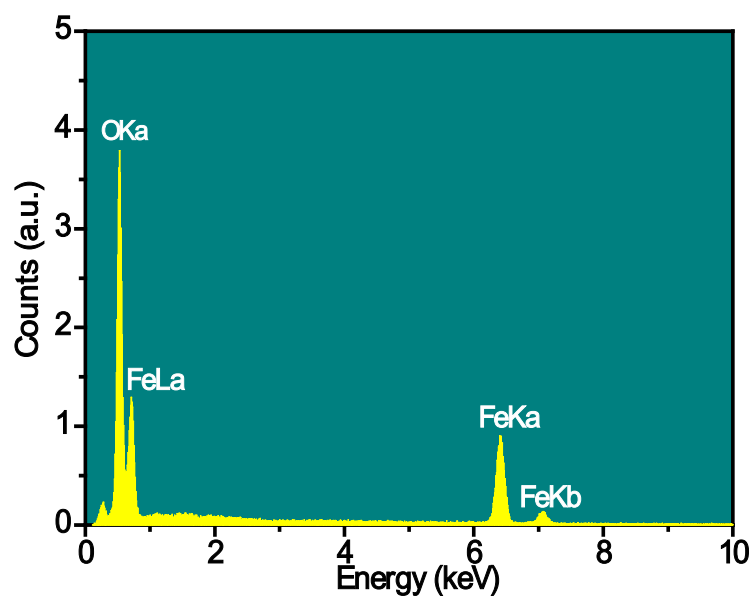

**Fig. S2** EDS analysis of the  $\text{Fe}_3\text{O}_4$  peony structures.

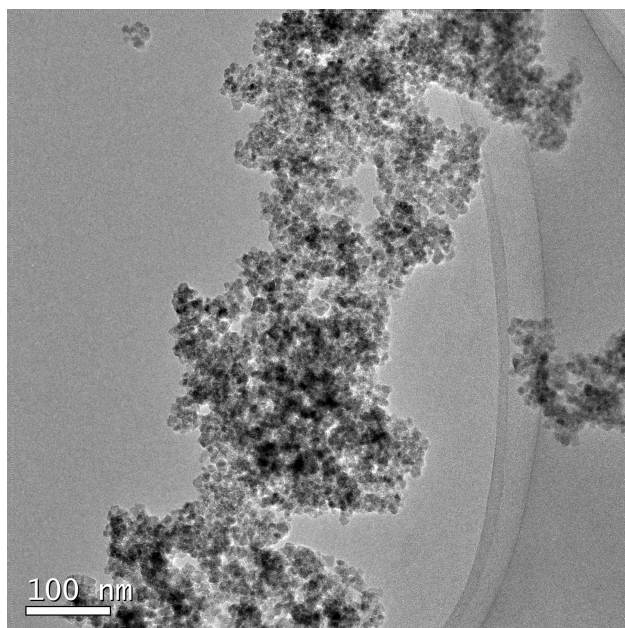

**Fig. S3** TEM image of the  $\text{Fe}_3\text{O}_4$  nanoparticles prepared without the addition of TEA under the same conditions.

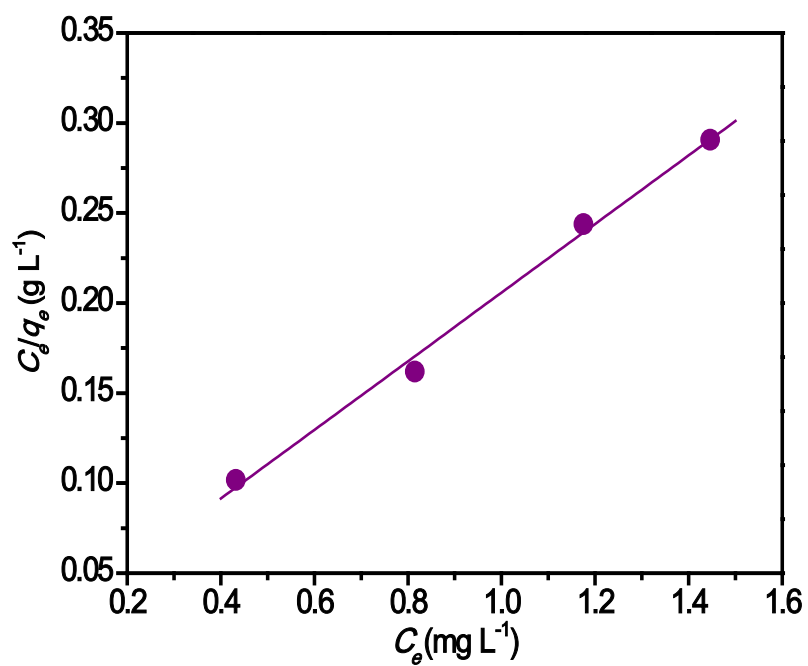

**Fig. S4** Langmuir plots for Cr (VI) removal by the  $\text{Fe}_3\text{O}_4$  peony structures at room temperature.
